# Supplementary material for: Study on the Measurement and Influencing Factors of Care Service Demand of Disabled Elderly in Urban and Rural China
Source: MDPI journal article supplement (doi:10.3390/ijerph191711112), 2022-09-05
Supplement: s1 [file s1]

## Supplementary Materials

Table S1. Description of variables in the Measurement And Influencing Factors of Care Service Demand of Disabled Elderly in Urban And Rural China.

| Variable                |                     | Description                                                                                                                                                                                                                                                                                                          | N    | Min | Max | Mean  | Sd    |
|-------------------------|---------------------|----------------------------------------------------------------------------------------------------------------------------------------------------------------------------------------------------------------------------------------------------------------------------------------------------------------------|------|-----|-----|-------|-------|
| Explanatory<br>Variable | Gender              | female=0; male=1                                                                                                                                                                                                                                                                                                     | 2917 | 0   | 1   | 54.1% | 0.498 |
|                         | Age                 | Age=2018-the year of birth                                                                                                                                                                                                                                                                                           | 2917 | 60  | 99  | 69.54 | 6.781 |
|                         | Tendency            | Unschool=1; Old-style Private School or Primary School=2; Middle School=3; High School or Technical Secondary                                                                                                                                                                                                        | 2916 | 1   | 5   | 2.113 | 0.939 |
|                         |                     | School=4; College or University Degree=5; Master Degree or Above=6                                                                                                                                                                                                                                                   |      |     |     |       |       |
|                         | Factors             | Attributes                                                                                                                                                                                                                                                                                                           | 2917 | 0   | 1   | 57.4% | 0.495 |
|                         | Worried Pension     | The questionnaire asked "what aspects of pension do you worry about?", Select any one of the answers "Daily Care" "Disease Care" or                                                                                                                                                                                  | 2917 | 0   | 1   | 48.5% | 0.500 |
|                         |                     | "Spiritual Comfort", which means that you are worried about it and the value is 1, else=0                                                                                                                                                                                                                            |      |     |     |       |       |
|                         | Economy             | The questionnaire asked "how was your family's economic situation in the past year?", Represents the economic situation of the elderly.<br>Very Difficult = 1; Relatively Difficult = 2; Roughly Enough, No Lack = 3; Comparative Margin = 4; Fairly Abundant = 5                                                    | 2917 | 1   | 5   | 1.968 | 0.838 |
|                         | Resource<br>Factors | The questionnaire asked "how many relatives can you pour out your thoughts and ask for help?", Represents the level of support that can<br>get help from loved ones. None = 1; 1=1; 2=2; 3~4=3; 5~8=4; 9 and above=5                                                                                                 | 2916 | 0   | 5   | 1.827 | 1.491 |
|                         |                     | The questionnaire asked "if you have long-term care insurance, you can reimburse part of your living care and medical care expenses<br>after participating, but you need to pay a certain amount of insurance premium. Are you willing to participate?", Unwilling to participate<br>= 0, willing to participate = 1 |      |     |     |       |       |
| Need<br>Factors         | LCI                 | The questionnaire asks "how do you feel about your health?", Reverse assignment according to the answer. Very Poor = 1; Comparison<br>Difference = 2; Better = 3; General = 4; Very Good = 5                                                                                                                         | 2675 | 1   | 5   | 2.253 | 0.934 |
|                         | Chronic Disease     | The questionnaire asks "do you have the following chronic diseases?", Sum up the number of chronic diseases according to the<br>answers. The value is 0 ~ 12, which represents the number of chronic diseases. 0 means "no chronic diseases", 12 means "12 kinds of<br>chronic diseases"                             | 2917 | 0   | 11  | 3.074 | 1.727 |

|                       |                                      |                           |                                                                                                                                                                                                                                                                                                                                                                                      |      |   |   |       |       |
|-----------------------|--------------------------------------|---------------------------|--------------------------------------------------------------------------------------------------------------------------------------------------------------------------------------------------------------------------------------------------------------------------------------------------------------------------------------------------------------------------------------|------|---|---|-------|-------|
| Explained<br>Variable | Type of<br>Care<br>Service<br>Demand | Disability Degree         | According to the answer of the activity of daily living scale (ADL), if 1 ~ 2 daily activities are difficult or unable to do, it is a mild disability and the value is 1; If 3 ~ 4 daily activities are difficult or unable to do, it is moderately disabled and the value is 2; If 5 ~ 6 daily activities are difficult or unable to do, it is severe disability and the value is 3 | 2916 | 1 | 3 | 1.693 | 0.789 |
|                       |                                      | Daily Care                | Select the answers of the three types of service items in the questionnaire: "meal assistance service (meal delivery, elderly dining table, etc.)," bath assistance service (help bathing) "and" door-to-door housework ". If one of the services needs to be taken as 1 , none need to be taken as 0                                                                                | 2914 | 0 | 1 | 31.2% | 0.463 |
|                       |                                      | Medical Treatment         | Select the answers of "door-to-door medical treatment" and "medical escort and escort" in the questionnaire. If one of the services needs to be taken as 1 , none is required, it is taken as 0                                                                                                                                                                                      | 2914 | 0 | 1 | 52.0% | 0.500 |
|                       |                                      | Health Education          | Select the answers of the "health education service" service items in the questionnaire. If there is a need for such services, the value is 1, if there is no need, the value is 0                                                                                                                                                                                                   | 2915 | 0 | 1 | 37.9% | 0.485 |
|                       |                                      | Rehabilitation<br>Nursing | Select the answers of "rehabilitation nursing" service items in the questionnaire. If there is a need for such services, the value is 1, if there is no need, the value is 0                                                                                                                                                                                                         | 2915 | 0 | 1 | 26.3% | 0.440 |
|                       |                                      | Psychological<br>Comfort  | Select the answers of "psychological counseling / chat and boredom" and "social work services (services carried out by social workers)" in the questionnaire. If one of the services needs to be taken as 1 , none is required, the value is 0                                                                                                                                       | 2912 | 0 | 1 | 43.8% | 0.496 |
|                       |                                      | Social Support            | Select the answer of "respite service (temporarily looking after your family for a period of time)" in the questionnaire. If such service is required, the value is 1, if not required, the value is 0                                                                                                                                                                               | 2916 | 0 | 1 | 20.3% | 0.402 |
|                       |                                      |                           |                                                                                                                                                                                                                                                                                                                                                                                      |      |   |   |       |       |
